# Supplementary material for: Detection of EP300-ZNF384 fusion in patients with acute lymphoblastic leukemia using RNA fusion gene panel sequencing
Source: Springer Nature journal article supplement (doi:10.1007/s00277-020-04251-8), 2020-09-26
Supplement: MOESM1 [file 18420250]

## Legends to supplementary Tables

### Supplementary-Table 1

Conventional gene fusion types detected by multiple-PCR. All the 56 case in this study was negative for the conventional gene fusions.

### Supplementary-Table 2

Detection of EP300-ZNF384 fusion by FISH. Eight out of ten cases were confirmed with FISH probes, except case 5 and 7, of which there were no more bone marrow specimens left. The green signals were EP300 probes and the red signals were ZNF384 probes. The yellow signals and the red and green signals in close tandem represent overlapping red and green signals are EP300-ZNF384 fusion.

### Supplementary-Table 1

| <b>Conventional gene fusion types detected by multiple-PCR</b> |
|----------------------------------------------------------------|
| AML1/ETO                                                       |
| AML1/EVI1                                                      |
| AML1/MDS1                                                      |
| AML1/MTG16                                                     |
| AML1/PRDM16                                                    |
| BCR/ABL                                                        |
| BCR/PDGFR                                                      |
| CBFB/MYH11                                                     |

|                       |
|-----------------------|
| C-MAF/IGH             |
| DEK/CAN               |
| E2A/PBX1              |
| FIPIL1/PDGFR $\alpha$ |
| HOX11/TCR             |
| HOX11L2/TCR           |
| MLL/AF10              |
| MLL/AF17              |
| MLL/AF4               |
| MLL/AF6               |
| MLL/AF9               |
| MLL/ELL               |
| MLL/ENL               |
| MLL/MLL               |
| MLL/PTD               |
| MYO/FGFR1             |
| NPM1/ALK              |
| NPM1/RARA             |
| NUP98/HOXA9           |
| PLZF/RARA             |
| PML/RARA              |

|                    |
|--------------------|
| SET/CAN            |
| SIL/TAL1           |
| TEL/ABL            |
| TEL/AML1           |
| TEL/JAK2           |
| TEL/PDGFR $\alpha$ |
| TEL/PDGFR $\beta$  |
| TLS/ERG            |

**Supplementary-Table 2**

| <b>Case</b> | <b>No. of cell with yellow color</b> | <b>Percent in 200 interphase cells</b> | <b>Figure</b>                                                                        |
|-------------|--------------------------------------|----------------------------------------|--------------------------------------------------------------------------------------|
| <b>1</b>    | 131                                  | 66%                                    | 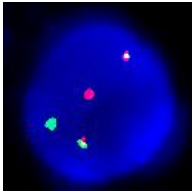 |
| <b>2</b>    | 129                                  | 65%                                    |  |
| <b>3</b>    | 20                                   | 10%                                    |  |

|           |     |     |                                                                                      |
|-----------|-----|-----|--------------------------------------------------------------------------------------|
| <b>4</b>  | 171 | 86% | 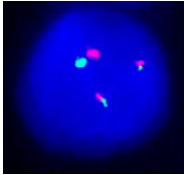   |
| <b>6</b>  | 135 | 68% |    |
| <b>8</b>  | 154 | 77% |    |
| <b>9</b>  | 143 | 72% |   |
| <b>10</b> | 154 | 77% |  |
